# Supplementary material
Source: publisher figshare collection journal article supplement (https://acs.figshare.com/ndownloader/files/3943855)
Supplement: Supplementary file 1 [file 3943855]

# **Exploring the chemical space around the privileged pyrazolo[3,4-*d*]pyrimidine scaffold: towards novel allosteric inhibitors of T315I- mutated Abl**

Giulia Vignaroli,<sup>†</sup> Martina Mencarelli,<sup>†</sup> Deborah Sementa,<sup>†</sup> Emmanuele Crespan,<sup>‡</sup> Miroslava  
Kissova,<sup>‡</sup> Giovanni Maga,<sup>‡</sup> Silvia Schenone,<sup>¥</sup> Marco Radi,<sup>†,□</sup> Maurizio Botta<sup>\*,†,§</sup>

<sup>†</sup>Dipartimento di Biotecnologie, Chimica e Farmacia, Università degli Studi di Siena, Via Aldo  
Moro 2, 53100 Siena, Italy

<sup>‡</sup>Istituto di Genetica Molecolare, IGM-CNR, Via Abbiategrasso 207, 27100 Pavia, Italy

<sup>¥</sup>Dipartimento di Scienza Farmaceutiche, Università degli Studi di Genova, Viale Benedetto XV 3,  
16132 Genova, Italy

<sup>□</sup>Dipartimento di Farmacia, Università degli Studi di Parma, Viale delle Scienze 27/A, 43124  
Parma, Italy.

<sup>§</sup>Sbarro Institute for Cancer Research and Molecular Medicine, Center for Biotechnology, College  
of Science and Technology, Temple University, BioLife Science Building, Suite 333, 1900 N 12<sup>th</sup>  
Street, Philadelphia, Pennsylvania 19122

## Contents:

|                            |           |
|----------------------------|-----------|
| <b>1. Chemistry</b>        | <b>3</b>  |
| <b>2. Enzymatic Assays</b> | <b>18</b> |

## General Methods

All commercially available chemicals were used as supplied without further purification. THF was dried over Na/benzophenone prior to use, POCl<sub>3</sub> was freshly distilled, while DMF was bought already anhydrous. Anhydrous reactions were run under a positive pressure of dry Argon. Microwave irradiation experiments were conducted using a CEM Discover Synthesis Unit (CEM Corp., Matthews, NC). The machine consists of a continuous focused microwave power delivery system with operator-selectable power output from 0 to 300 W. The temperature of the contents of the vessels was monitored using a calibrated infrared temperature control located under the reaction vessel.

Merck pre-coated TLC plates (silica gel 60 F<sub>254</sub>, 0.25 mm) were used. UV detection was monitored at 254 nm. Chromatographic purifications were performed on columns packed with Merk 60 silica gel, 23-400 mesh, for flash technique. <sup>1</sup>H NMR and <sup>13</sup>C NMR spectra were obtained using a Bruker Avance DPX400 (Bruker Biospin, Germany). Chemical shifts were reported in parts per million (ppm) from tetramethylsilane as internal standard. Multiplicities were indicated as follow: s (singlet), d (doublet), t (triplet), q (quartet), m (multiplet), dd (doublet of doublet), dt (doublet of triplet), td (triplet of doublet), bs (broad singlet). Coupling constants were reported in hertz (Hz). LC-MS was performed with the UV detection at 254 nm and a single quadrupole mass spectrometer using electrospray ionization (ESI) source.

### 1. Chemistry

#### 2-(Methylthio)pyrimidine-4,6-diol (**2**)

A mixture of KOH (5.84 g, 104.1 mmol, 3.00 eq.), H<sub>2</sub>O (50 mL), 2-thiobarbituric acid (**1**) (5.00 g, 34.7 mmol, 1.00 eq.) and MeI (2.4 mL, 38.2 mmol, 1.10 eq.) was stirred under reflux for 3h. The transparent solution was allowed to cool to r.t., then acidified with 3N HCl until pH~2. The product

was obtained as a light yellow precipitate, recovered from the reaction mixture by filtration under vacuum. Yield: 87%. Pale yellow solid.  $^1\text{H NMR}$  ( $(\text{CD}_3)_2\text{S=O}$ ): 11.7 (bs, 2H), 5.12 (s, 1H); 2.06 (s, 3H).  $^{13}\text{C NMR}$  ( $(\text{CD}_3)_2\text{S=O}$ ) : 167.6, 164.0, 86.0, 13.2. **MS** (ESI)  $m/z$ : 159  $[\text{M} + \text{H}]^+$ , 181  $[\text{M} + \text{Na}]^+$ .

#### **4,6-Dichloro-2-(methylthio)pyrimidine-5-carbaldehyde (3a)**

To an ice-cooled solution of freshly distilled  $\text{POCl}_3$  (4.40 mL, 47.5 mmol, 7.50 eq.) was slowly added anhydrous DMF (1.60 mL, 19.0 mmol, 3.00 eq.). The mixture was stirred at r.t. for 1h, during this time it turned to bright yellow. 2-(methylthio)pyrimidine-4,6-diol (**2**) (1.00 g, 6.33 mmol, 1.00 eq.) was added in three times over 30 min and the reaction mixture was stirred under reflux o.n. Once cooled to r.t.,  $\text{H}_2\text{O}$  (50 mL) was added and the suspension was stirred at r.t. o.n. After this time extraction with EtOAc (3 x 50 mL) was performed, the collected organic phases were dried over  $\text{Na}_2\text{SO}_4$ , filtered and the solvent removed under reduced pressure. The yellow oily residue obtained was purified by flash chromatography (Hex:EtOAc = 99:1) to obtain both products as a white solid. Yield: 42%. White solid.  $^1\text{H NMR}$  ( $\text{CDCl}_3$ ): 10.3 (s, 1H), 2.55 (s, 3H).  $^{13}\text{C NMR}$  ( $\text{CDCl}_3$ ): 185.2, 176.9, 162.2, 118.9, 14.7.

#### **4,6-Dichloro-2-(methylthio)pyrimidine (3b)**

2-(Methylthio)pyrimidine-4,6-diol (**2**) (1.00 g, 6.33 mmol, 1.00 eq.) was added to a solution of freshly distilled  $\text{POCl}_3$  (4.40 mL, 47.5 mmol, 7.50 eq.). The yellow solution was reflux o.n., then allowed to cool to r.t.  $\text{H}_2\text{O}$  (50 mL) was added and extraction with EtOAc (3 x 50 mL) was performed, the collected organic phases were dried over  $\text{Na}_2\text{SO}_4$ , filtered and the solvent removed under reduced pressure. The yellow oily residue obtained was purified by flash chromatography (Hex:EtOAc = 99:1) to obtain the products as a yellow oil which solidified under vacuum. Yield:

80%. White solid.  $^1\text{H}$  NMR ( $\text{CDCl}_3$ ): 6.89 (s, 1H); 2.57 (s, 3H).  $^{13}\text{C}$  NMR ( $\text{CDCl}_3$ ): 174.1, 161.2, 115.6, 13.9. MS (ESI)  $m/z$ : 196  $[\text{M} + \text{H}]^+$ .

#### 4-Chloro-6-(methylthio)-1H-pyrazolo[3,4-*d*]pyrimidine (4)

Synthesized according to **GP1**. Yield: 97%. Yellow solid.  $^1\text{H}$  NMR ( $\text{CDCl}_3$ ): 8.09 (s, 1H), 2.65 (s, 3H).  $^{13}\text{C}$  NMR ( $\text{CDCl}_3$ ): 171.1, 155.5, 154.4, 133.7, 110.3, 14.6. MS (ESI)  $m/z$ : 199  $[\text{M} - \text{H}]^-$ .

#### 4,6-Dichloro-2-(methylthio)pyrimidin-5-yl(phenyl)methanol (5)

Synthesized according to **GP4**. Yield: 40%. Light brown solid.  $^1\text{H}$  NMR ( $\text{CDCl}_3$ ): 7.32 (m, 5H); 6.48 (s, 1H); 2.56 (s, 3H).  $^{13}\text{C}$  NMR ( $\text{CDCl}_3$ ): 172.3, 161.1, 139.9, 128.5, 127.8, 127.0, 125.3, 70.5, 14.4.

#### (4,6-Dichloro-2-(methylthio)pyrimidin-5-yl)(phenyl)methanone (6)

Synthesized according to **GP5**. Yield: 60%. White solid.  $^1\text{H}$  NMR ( $\text{CDCl}_3$ ): 7.84 (d,  $J = 7.6$  Hz, 2H); 7.67 (t,  $J = 7.6$  Hz, 1H); 7.52 (t,  $J = 7.6$  Hz, 2H); 2.62 (s, 3H).  $^{13}\text{C}$  NMR ( $\text{CDCl}_3$ ): 189.3, 174.4, 158.0, 135.0, 129.6, 129.3, 129.2, 126.0, 14.5.

#### 4-Chloro-6-(methylthio)-3-phenyl-1H-pyrazolo[3,4-*d*]pyrimidine (7)

Synthesized according to **GP1**. Yield: quant. Light yellow solid.  $^1\text{H}$  NMR ( $\text{CD}_2\text{Cl}_2 + 0.05$  mL MeOD): 7.73 (m, 2H); 7.48 (m, 3H); 2.63 (s, 3H).  $^{13}\text{C}$  NMR ( $\text{CD}_2\text{Cl}_2 + 0.05$  mL MeOD): 169.9, 156.8, 154.2, 146.1, 135.0, 129.9, 129.0, 128.1, 107.4, 13.9.

#### 4-Chloro-6-(methylthio)-1-phenethyl-1H-pyrazolo[3,4-*d*]pyrimidine (8a)

Synthesized according to **GP2**. Yield: 71%. Light yellow oil.  $^1\text{H}$  NMR ( $\text{CDCl}_3$ ): 7.97 (s, 1H), 7.16 (m, 5H), 4.63 (t,  $J = 7.4$  Hz, 2H), 3.22 (t,  $J = 7.4$  Hz, 2H), 2.55 (s, 3H).  $^{13}\text{C}$  NMR ( $\text{CDCl}_3$ ): 169.5, 153.9, 153.7, 137.6, 132.3, 128.7, 128.5, 126.7, 110.3, 48.7, 35.7, 14.4.

**1-Benzyl-4-chloro-6-(methylthio)-1H-pyrazolo[3,4-*d*]pyrimidine (8b)**

Synthesized according to **GP2**. Yield: 61%. Light yellow oil.  $^1\text{H}$  NMR ( $\text{CDCl}_3$ ): 8.01 (s, 1H), 7.30 (m, 5H), 5.57 (s, 2H), 2.64 (s, 3H).  $^{13}\text{C}$  NMR ( $\text{CDCl}_3$ ): 170.3, 154.0, 153.9, 135.7, 132.7, 128.7, 128.2, 110.9, 51.3, 14.5.

**4-Chloro-1-(2-methoxy-2-phenylethyl)-6-(methylthio)-1H-pyrazolo[3,4-*d*]pyrimidine (8c)**

Synthesized according to **GP2**. Yield: 64%. White solid.  $^1\text{H}$  NMR ( $\text{CDCl}_3$ ): 8.01 (s, 1H), 7.30 (m, 5H), 4.81 (m, 1H), 4.73 (m, 1H), 4.48 (m,  $J = 4.8, 13.6$  Hz, 1H), 3.19 (s, 3H), 2.58 (s, 3H).  $^{13}\text{C}$  NMR ( $\text{CDCl}_3$ ): 169.9, 154.3, 153.7, 138.3, 132.4, 128.6, 128.4, 126.7, 110.3, 81.6, 57.0, 53.1, 14.4

**4-Chloro-6-(methylthio)-1-(prop-2-ynyl)-1H-pyrazolo[3,4-*d*]pyrimidine (8d)**

Synthesized according to **GP2**. Yield: 38%. White solid.  $^1\text{H}$  NMR ( $\text{CDCl}_3$ ): 8.05 (s, 1H), 5.18 (s, 2H), 2.63 (s, 3H), 2.39 (s, 1H).  $^{13}\text{C}$  NMR ( $\text{CDCl}_3$ ): 170.8, 154.0, 153.8, 133.3, 110.6, 76.4, 73.6, 36.8, 14.6.

**4-Chloro-6-(methylthio)-1-phenethyl-3-phenyl-1H-pyrazolo[3,4-*d*]pyrimidine (8e)**

Synthesized according to **GP2**. Yield: 72%. White solid.  $^1\text{H}$  NMR ( $\text{CDCl}_3$ ): 7.77 (m, 2H); 7.50 (m, 3H); 7.22 (m, 5H); 4.70 (t,  $J = 7.6$  Hz, 2H); 3.28 (t,  $J = 7.6$  Hz, 2H); 2.60 (s, 3H).  $^{13}\text{C}$  NMR ( $\text{CDCl}_3$ ): 169.6, 155.0, 154.1, 145.4, 137.8, 131.3, 129.9, 129.1, 128.8, 128.6, 128.2, 126.8, 107.8, 43.7, 35.8, 14.4.

**4-Chloro-1-(2-methoxy-2-phenylethyl)-6-(methylthio)-3-phenyl-1*H*-pyrazolo[3,4-*d*]pyrimidine (8f)**

Synthesized according to **GP2**. Yield: 69%. White solid. <sup>1</sup>H NMR (CDCl<sub>3</sub>): 7.77 (m, 2H); 7.49 (m, 3H); 7.32 (m, 5H); 4.90 (m, 1H); 4.83 (m, 1H); 4.51 (dd, *J* = 4.8 Hz, 8.8 Hz, 1H); 3.22 (s, 3H); 2.61 (s, 3H). <sup>13</sup>C NMR (CDCl<sub>3</sub>): 169.6, 155.6, 154.0, 145.5, 138.5, 131.33, 130.0, 129.1, 128.6, 128.5, 128.2, 126.9, 107.8, 81.5, 57.1, 53.0, 14.4.

***N*-(3-chlorophenyl)-6-(methylthio)-1-phenethyl-1*H*-pyrazolo[3,4-*d*]pyrimidin-4-amine (9a)**

Synthesized according to **GP3** from **8a**; purified by crystallization from EtOH. Yield: 92%. White solid. <sup>1</sup>H NMR (CDCl<sub>3</sub>+0.05mL CD<sub>3</sub>OD): 7.62 (s, 1H), 7.20 (m, 9H), 4.46 (t, *J* = 7.6 Hz, 2H), 3.11 (t, *J* = 7.4 Hz, 2H), 2.50 (s, 1H). <sup>13</sup>C NMR (CDCl<sub>3</sub>+0.05mL CD<sub>3</sub>OD): 168.4, 154.1, 153.7, 138.7, 137.9, 134.9, 131.6, 130.2, 128.7, 128.5, 126.6, 125.9, 123.6, 121.4, 98.1, 48.3, 35.7, 14.2. **MS** (ESI) *m/z*: 396 [M+H]<sup>+</sup>.

***N*-Cyclohexyl-6-(methylthio)-1-phenethyl-1*H*-pyrazolo[3,4-*d*]pyrimidin-4-amine (9b)**

Synthesized according to **GP3** from **8a**; purified by crystallization from EtOH. Yield: 40%. White solid. <sup>1</sup>H NMR ((CD<sub>3</sub>)<sub>2</sub>CO): 7.87 (s, 1H), 7.20 (m, 5H), 4.50 (t, *J* = 7.4 Hz, 2H), 4.14 (bs, 1H), 3.19 (t, *J* = 7.4 Hz, 2H), 2.50 (s, 1H), 2.04 (m, 3H), 1.77 (d, *J* = 12.0 Hz, 2H), 1.65 (d, *J* = 12.8 Hz, 1H), 1.32 (m, 5H). <sup>13</sup>C NMR ((CD<sub>3</sub>)<sub>2</sub>CO): 168.9, 155.0, 153.9, 138.7, 130.9, 128.8, 128.3, 126.6, 98.4, 47.6, 35.3, 32.6, 25.5, 24.5, 13.6. **MS** (ESI) *m/z*: 368 [M+H]<sup>+</sup>, 390 [M+Na]<sup>+</sup>.

**3-(6-(Methylthio)-1-phenethyl-1*H*-pyrazolo[3,4-*d*]pyrimidin-4-ylamino)phenol (9c)**

Synthesized according to **GP3** from **8a**; the oily residue was dissolved in EtOAc and the organic phase was extracted two times with 0.5 N HCl. The organic layer was dried over Na<sub>2</sub>SO<sub>4</sub>, filtered then the solvent evaporated under reduced pressure to obtain the product as a light brown solid.

Yield: 84%. Light brown solid.  $^1\text{H}$  NMR ( $\text{CDCl}_3+0.05\text{mL CD}_3\text{OD}$ ): 7.04 (m, 10H), 4.51 (t,  $J = 7.6$  Hz, 2H), 3.13 (t,  $J = 7.6$  Hz, 2H), 2.52 (s, 1H).  $^{13}\text{C}$  NMR ( $\text{CDCl}_3+0.05\text{mL CD}_3\text{OD}$ ): 169.2, 157.3, 155.2, 154.2, 138.4, 130.4, 128.7, 128.5, 126.6, 116.6, 114.2, 112.2, 97.9, 48.2, 35.7, 14.1. MS (ESI)  $m/z$ : 378  $[\text{M}+\text{H}]^+$ .

**6-(Methylthio)-1-phenethyl-*N*-phenyl-1*H*-pyrazolo[3,4-*d*]pyrimidin-4-amine (9d)**

Synthesized according to **GP3** from **8a**; purified by flash chromatography using DCM:MeOH = 99:1 as eluent. Yield: 91%. White solid.  $^1\text{H}$  NMR ( $\text{CDCl}_3$ ): 7.60 (s, 1H), 7.44 (m, 4H), 7.22 (m, 4H), 4.54 (t,  $J = 7.6$ , 2H), 3.18 (t,  $J = 7.6$ , 2H), 2.57 (s, 3H).  $^{13}\text{C}$  NMR ( $\text{CDCl}_3$ ): 169.3, 155.2, 154.5, 138.2, 137.7, 132.0, 131.8, 129.2, 128.8, 128.6, 126.5, 124.8, 97.9, 48.1, 35.7, 14.1. MS (ESI)  $m/z$ : 362  $[\text{M}+\text{H}]^+$ .

**6-(Methylthio)-1-phenethyl-*N*-(4-(trifluoromethoxy)phenyl)-1*H*-pyrazolo[3,4-*d*]pyrimidin-4-amine (9e)**

Synthesized according to **GP3** from **8a**; purified by flash chromatography using DCM:MeOH = 99:1 as eluent. Yield: 75%. White solid.  $^1\text{H}$  NMR ( $\text{CDCl}_3$ ): 7.50 (d,  $J = 8.4$  Hz, 2H), 7.16 (m, 8H), 4.48 (t,  $J = 7.4$  Hz, 2H), 3.11 (t,  $J = 7.6$  Hz, 2H), 2.48 (s, 3H).  $^{13}\text{C}$  NMR ( $\text{CDCl}_3$ ): 170.1, 155.3, 155.2, 146.2, 138.8, 137.2, 131.9, 129.5, 129.3, 127.4, 125.7, 122.7, 99.0, 49.1, 36.5, 15.0. MS (ESI)  $m/z$ : 446  $[\text{M}+\text{H}]^+$ .

**1-Benzyl-*N*-cyclohexyl-6-(methylthio)-1*H*-pyrazolo[3,4-*d*]pyrimidin-4-amine (9f)**

Synthesized according to **GP3** from **8b**; the oily residue was dissolved in EtOAc and the organic phase was extracted twice with 0.5 N HCl. The organic layer was dried over  $\text{Na}_2\text{SO}_4$ , filtered then the solvent evaporated under reduced pressure to obtain the product as a light brown solid. Yield: 70%. Light brown solid.  $^1\text{H}$  NMR ( $\text{CDCl}_3$ ): 7.75 (s, 1H), 5.49 (s, 2H), 2.58 (s, 3H), 2.10 (d,  $J = 10.0$  Hz, 2H), 1.80 (d,  $J = 12.4$  Hz, 2H), 1.67 (d,  $J = 12.0$  Hz, 1H), 1.36 (m, 7H).  $^{13}\text{C}$  NMR



$((\text{CD}_3)_2\text{CO})$ : 170.2, 155.9, 154.9, 138.4, 132.2, 129.2, 128.7, 128.2, 99.3, 50.8, 50.2, 33.4, 26.2, 25.7, 14.0. **MS** (ESI)  $m/z$ : 354  $[\text{M}+\text{H}]^+$

### **3-(1-Benzyl-6-(methylthio)-1*H*-pyrazolo[3,4-*d*]pyrimidin-4-ylamino)phenol (9g)**

Synthesized according to **GP3** from **8b**; the oily residue was dissolved in EtOAc and the organic phase was extracted twice with 0.5 N HCl. The organic layer was dried over  $\text{Na}_2\text{SO}_4$ , filtered then the solvent evaporated under reduced pressure to obtain the product as a light brown solid. Yield: 56%. Light brown solid.  **$^1\text{H}$  NMR** ( $\text{CD}_3\text{OD}$ ): 7.89 (s, 1H), 7.25 (m, 6H), 7.16 (d,  $J = 5.2\text{Hz}$ , 2H), 6.67 (m, 1H), 5.47 (s, 2H), 2.57 (s, 3H).  **$^{13}\text{C}$  NMR** ( $((\text{CD}_3)_2\text{S}=\text{O})$ ): 169.2, 158.0, 154.2, 153.8, 140.2, 137.6, 132.9, 129.8, 129.0, 128.1, 128.0, 112.6, 111.4, 108.9, 99.2, 50.3, 14.2. **MS** (ESI)  $m/z$ : 364  $[\text{M}+\text{H}]^+$ .

### **3-(1-(2-Methoxy-2-phenylethyl)-6-(methylthio)-1*H*-pyrazolo[3,4-*d*]pyrimidin-4-ylamino)phenol (9h)**

Synthesized according to **GP3** from **8c**; the oily residue was dissolved in EtOAc and the organic phase was extracted twice with 0.5 N HCl. The organic layer was dried over  $\text{Na}_2\text{SO}_4$ , filtered then the solvent evaporated under reduced pressure to obtain the product as a light brown solid. Yield: 98%. Light brown solid.  **$^1\text{H}$  NMR** ( $\text{CD}_3\text{OD}+0.05\text{mL CDCl}_3$ ): 7.87 (s, 1H), 7.19 (m, 8H), 6.60 (m, 1H), 4.73 (dd,  $J = 4.8, 8.2\text{ Hz}$ , 1H), 4.56 (dd,  $J = 8.4, 14\text{ Hz}$ , 1H), 4.32 (dd,  $J = 4.8, 14\text{ Hz}$ , 1H), 3.11 (s, 3H), 2.51 (s, 3H).  **$^{13}\text{C}$  NMR** ( $\text{CD}_3\text{OD}+0.05\text{mL CDCl}_3$ ): 169.9, 157.4, 154.4, 154.1, 139.7, 138.5, 131.9, 129.1, 128.2, 128.0, 126.6, 113.2, 111.2, 109.1, 98.6, 81.8, 55.9, 52.2, 13.2. **MS** (ESI)  $m/z$ : 408  $[\text{M}+\text{H}]^+$ .

**1-(2-Methoxy-2-phenylethyl)-6-(methylthio)-*N*-(pyridin-4-ylmethyl)-1*H*-pyrazolo[3,4-*d*]pyrimidin-4-amine (9i)**

Synthesized according to **GP3** from **8c**; the oily residue was dissolved in EtOAc and the organic phase was extracted twice with 0.5 N HCl. The organic layer was dried over Na<sub>2</sub>SO<sub>4</sub>, filtered then the solvent evaporated under reduced pressure to obtain the product as a light yellow solid. Yield: 81%. Light yellow solid. <sup>1</sup>H NMR (CDCl<sub>3</sub>): 8.40 (d, *J* = 5.6 Hz, 2H), 7.86 (s, 1H), 7.27 (m, 6H), 4.73 (m, 1H), 4.56 (dd, *J* = 8.8, 14 Hz, 1H), 4.32 (dd, *J* = 4.8, 14 Hz, 1H), 4.08 (s, 2H), 3.11 (s, 3H), 2.41 (s, 3H). <sup>13</sup>C NMR (CDCl<sub>3</sub>): 169.8, 156.0, 154.4, 149.1, 148.9, 138.5, 131.4, 128.4, 128.2, 126.7, 122.7, 98.9, 81.7, 56.7, 52.7, 43.1, 13.9. MS (ESI) *m/z*: 407 [M+H]<sup>+</sup>.

**1-(2-Methoxy-2-phenylethyl)-6-(methylthio)-*N*-(4-(trifluoromethoxy)phenyl)-1*H*-pyrazolo[3,4-*d*]pyrimidin-4-amine (9j)**

Synthesized according to **GP3** from **8c**; purified by flash chromatography using DCM:MeOH = 99:1 as eluent. Yield: 88%. White solid. <sup>1</sup>H NMR (CDCl<sub>3</sub>): 7.69 (s, 1H), 7.60 (d, *J* = 8.8 Hz, 2H), 7.31 (m, 5H), 7.24 (d, *J* = 8.4 Hz, 2H), 4.80 (dd, *J* = 4.8, 8.4 Hz, 1H), 4.64 (dd, *J* = 8.8, 14 Hz, 1H), 4.39 (dd, *J* = 4.4, 14 Hz, 1H), 3.15 (s, 3H), 2.54 (s, 3H). <sup>13</sup>C NMR (CDCl<sub>3</sub>): 169.4, 154.6, 153.9, 145.8, 138.5, 136.8, 131.4, 128.4, 128.2, 126.7, 123.7, 121.6, 98.4, 81.6, 56.8, 52.7, 14.1. MS (ESI) *m/z*: 476 [M+H]<sup>+</sup>.

**3-(6-(Methylthio)-1-(prop-2-ynyl)-1*H*-pyrazolo[3,4-*d*]pyrimidin-4-ylamino)phenol (9k)**

Synthesized according to **GP3** from **8d**; the oily residue was dissolved in EtOAc and the organic phase was extracted two times with 0.5 N HCl. The organic layer was dried over Na<sub>2</sub>SO<sub>4</sub>, filtered then the solvent evaporated under reduced pressure to obtain the product as a light brown solid. Yield: quant. Light brown solid. <sup>1</sup>H NMR (CDCl<sub>3</sub>+0.05 mL CD<sub>3</sub>OD): 7.53 (s, 1H), 7.09 (m, 3H), 6.61 (d, *J* = 7.6 Hz, 1H), 5.00 (d, *J* = 1.6 Hz, 2H), 2.51 (s, 3H), 2.32 (m, 1H). <sup>13</sup>C NMR

(CDCl<sub>3</sub>+0.05 mL CD<sub>3</sub>OD): 170.1, 157.2, 154.0, 153.9, 138.8, 133.1, 129.6, 114.5, 112.4, 110.2, 98.5, 72.8, 35.8, 29.4, 13.9. **MS** (ESI) *m/z*: 312 [M+H]<sup>+</sup>, 334 [M+Na]<sup>+</sup>.

***N*-Methyl-6-(methylthio)-1-(prop-2-ynyl)-*N*-(pyridin-3-yl)-1*H*-pyrazolo[3,4-*d*]pyrimidin-4-amine (9l)**

Synthesized according to **GP3** from **8d**; the oily residue was dissolved in EtOAc and the organic phase was extracted twice with 0.5 N HCl. The organic layer was dried over Na<sub>2</sub>SO<sub>4</sub>, filtered then the solvent evaporated under reduced pressure to obtain the product as a light yellow solid. Yield: 92%. Light yellow solid. <sup>1</sup>H NMR (CDCl<sub>3</sub>): 8.56 (d, *J* = 3.6 Hz, 1H), 7.89 (s, 1H), 7.69 (t, *J* = 7.4 Hz, 1H), 7.24 (m, 2H), 5.09 (s, 1H), 4.86 (d, *J* = 4.4 Hz, 3H), 2.57 (s, 3H), 2.34 (m, 1H). <sup>13</sup>C NMR (CDCl<sub>3</sub>): 170.0, 156.1, 155.3, 153.9, 148.7, 137.2, 131.8, 122.7, 98.8, 72.8, 36.0, 29.7, 14.2. **MS** (ESI) *m/z*: 311 [M+H]<sup>+</sup>, 333 [M+Na]<sup>+</sup>.

**6-(Methylthio)-1-(prop-2-yn-1-yl)-*N*-(4-(trifluoromethoxy)phenyl)-1*H*-pyrazolo[3,4-*d*]pyrimidin-4-amine (9m)**

Synthesized according to **GP3** from **8d**. Yield: 89%. White solid. <sup>1</sup>H NMR (CDCl<sub>3</sub>): 7.70 (s, 1H); 7.61 (d, *J* = 9.2 Hz, 2H); 7.24 (m, 5H); 5.17 (d, *J* = 2.4 Hz, 1H); 2.62 (s, 3H); 2.38 (m, 1H). <sup>13</sup>C NMR (CDCl<sub>3</sub>): 169.5, 154.6, 154.0, 145.8, 136.9, 131.5, 128.3, 123.8, 121.6, 98.5, 73.0, 35.8, 29.4, 14.1. **MS** (ESI) *m/z*: 380 [M+H]<sup>+</sup>.

***N*-Methyl-6-(methylthio)-1-phenethyl-3-phenyl-1*H*-pyrazolo[3,4-*d*]pyrimidin-4-amine (9n)**

Synthesized according to **GP3** from **8e**; the oily residue was dissolved in EtOAc and the organic phase was extracted twice with 0.5 N HCl. The organic layer was dried over Na<sub>2</sub>SO<sub>4</sub>, filtered then the solvent evaporated under reduced pressure to obtain the product as a white solid. Yield: 81%.

White solid.  $^1\text{H}$  NMR ( $\text{CDCl}_3$ ): 7.62 (d,  $J = 7.2$  Hz, 2H); 7.50 (m, 3H); 7.25 (m, 5H); 5.34 (bs, 1H); 4.62 (t,  $J = 7.6$  Hz, 2H); 3.25 (t,  $J = 7.6$  Hz, 2H); 3.06 (s, 3H); 2.59 (s, 3H).  $^{13}\text{C}$  NMR ( $\text{CDCl}_3$ ): 170.1, 157.2, 155.2, 144.9, 139.1, 134.5, 130.2, 129.8, 129.7, 129.3, 129.2, 127.4, 97.0, 49.2, 36.7, 28.8, 15.0. MS (ESI)  $m/z$ : 376  $[\text{M}+\text{H}]^+$ .

**1-(2-Methoxy-2-phenylethyl)-*N*-methyl-6-(methylthio)-3-phenyl-1*H*-pyrazolo[3,4-*d*]pyrimidin-4-amine (9o)**

Synthesized according to **GP3** from **8f**; the oily residue was dissolved in EtOAc and the organic phase was extracted twice with 0.5 N HCl. The organic layer was dried over  $\text{Na}_2\text{SO}_4$ , filtered then the solvent evaporated under reduced pressure to obtain the product as a white solid. Yield: quant. White solid.  $^1\text{H}$  NMR ( $\text{CDCl}_3$ ): 7.62 (d,  $J = 7.2$  Hz, 2H); 7.48 (m, 3H); 7.32 (m, 5H); 5.26 (bs, 1H); 4.91 (dd,  $J = 5.2$ , 8 Hz, 1H); 4.70 (dd,  $J = 8.0$ , 9.6 Hz, 1H); 4.44 (dd,  $J = 5.2$ , 14 Hz, 1H); 3.21 (s, 3H); 3.04 (d,  $J = 4.8$  Hz, 3H); 2.58 (s, 3H).  $^{13}\text{C}$  NMR ( $\text{CDCl}_3$ ): 169.5, 156.6, 155.3, 144.0, 139.0, 133.8, 129.3, 128.9, 128.5, 128.4, 128.2, 127.0, 96.3, 81.7, 57.1, 52.7, 27.8, 14.2. MS (ES)  $m/z$ : 406  $[\text{M}+\text{H}]^+$ .

**1-(2-Methoxy-2-phenylethyl)-6-(methylthio)-3-phenyl-1*H*-pyrazolo[3,4-*d*]pyrimidin-4-amine (9p)**

In a sealed tube equipped with a rubber septum, to a suspension of **8f** (44.7 mg, 0.11 mmol, 1.00 eq.) in EtOH (1 mL) at  $-78^\circ\text{C}$  was added  $\text{NH}_3$  7 N in MeOH (1 mL). The tube was sealed and the reaction was heated to reflux o.n. The solvent was removed under reduced pressure, to obtain a solid residue, purified by flash chromatography using PE:EtOAc = 85:15 as eluent. Yield: 92%. White solid.  $^1\text{H}$  NMR ( $\text{CDCl}_3$ ): 7.66 (d,  $J = 6.8$  Hz, 2H); 7.48 (m, 3H); 7.31 (m, 5H); 5.71 (bs, 2H); 4.90 (dd,  $J = 5.2$ , 8 Hz, 1H); 4.71 (dd,  $J = 8.4$ , 14 Hz, 1H); 4.46 (dd,  $J = 5.2$ , 14 Hz, 1H); 3.22 (s, 3H); 2.56 (s, 3H).  $^{13}\text{C}$  NMR ( $\text{CDCl}_3$ ): 169.2, 156.8, 155.7, 144.6, 138.9, 133.4, 129.3, 129.0, 128.5,

128.4, 128.2, 126.9, 96.0, 81.7, 57.1, 52.7, 14.0. **MS** (ESI)  $m/z$ : [392 [M+H], 414 [M+Na], 430 [M+K]]<sup>+</sup>.

***N*<sup>4</sup>-(3-Chlorophenyl)-1-phenethyl-*N*<sup>6</sup>-propyl-1*H*-pyrazolo[3,4-*d*]pyrimidine-4,6-diamine (10a)**

Synthesized according to **GP6** starting from **9a**, using *n*-propylamine as nucleophile. Yield: 50%.

White solid. <sup>1</sup>**H NMR** (CDCl<sub>3</sub>): 7.85 (s, 1H), 7.26 (m, 9H), 5.12 (s, 1H), 4.52 (t, *J* = 7.6 Hz, 2H), 3.42 (q, *J* = 6.5 Hz, 2H), 3.18 (t, *J* = 7.8 Hz, 2H), 1.66 (q, *J* = 7.2 Hz, 2H), 1.00 (t, *J* = 7.4 Hz, 3H).

<sup>13</sup>**C NMR** (CDCl<sub>3</sub>): 161.2, 156.2, 154.9, 139.8, 138.4, 134.8, 130.6, 129.9, 128.8, 128.4, 126.4, 124.3, 122.1, 119.7, 96.2, 47.8, 43.6, 35.6, 23.0, 11.6. **MS** (ESI)  $m/z$ : 407 [M+H]<sup>+</sup>.

***N*<sup>4</sup>-(3-chlorophenyl)-*N*<sup>6</sup>-(2-morpholinoethyl)-1-phenethyl-1*H*-pyrazolo[3,4-*d*]pyrimidine-4,6-diamine (10b)**

Synthesized according to **GP6** starting from **9a**, using 4-(2-aminoethyl)morpholine (5.0 eq.) as nucleophile. Yield: 89%. White solid. <sup>1</sup>**H NMR** (CDCl<sub>3</sub>): 7.81 (s, 1H), 7.51 (s, 1H); 7.38 (m, 1H);

7.17 (m, 7H), 5.56 (bs, 1H), 4.42 (t, *J* = 8 Hz, 2H), 3.70 (t, *J* = 4.4 Hz, 4H), 3.55 (m, 2H), 3.15 (t, *J* = 8 Hz, 2H), 2.59 (t, *J* = 6 Hz, 2H), 2.48 (s, 4H). <sup>13</sup>**C NMR** (CDCl<sub>3</sub>): 161.0, 156.2, 155.0, 139.9, 138.4, 134.6, 130.9, 129.9, 128.8, 128.5, 126.4, 124.3, 122.2, 119.9, 96.3, 66.9, 57.5, 53.5, 47.8, 38.1, 35.7. **MS** (ESI)  $m/z$ : 478 [M+H]<sup>+</sup>, 500 [M+Na]<sup>+</sup>.

***N*-cyclohexyl-6-(2-morpholinoethoxy)-1-phenethyl-1*H*-pyrazolo[3,4-*d*]pyrimidin-4-amine (10c)**

Synthesized according to **GP6** starting from **9b**, using 2-morpholinoethanol (5.0 eq.) as nucleophile. Yield: 48%. White solid. <sup>1</sup>**H NMR** ((CD<sub>3</sub>)<sub>2</sub>CO): 7.72 (s, 1H); 7.07 (m, 5H); 4.31 (t, *J* = 7.2 Hz, 4H); 3.46 (m, 4H); 3.04 (t, *J* = 7.4 Hz, 2H); 2.04 (m, 4H); 1.77 (m, 2H); 1.67 (m, 1H); 1.32

(m, 4H).  $^{13}\text{C}$  NMR ((CD<sub>3</sub>)<sub>2</sub>CO): 165.2, 158.8, 156.1, 139.5, 131.7, 129.5, 129.1, 127.0, 98.4, 67.3, 64.5, 58.1, 54.8, 48.3, 40.8, 36.1, 32.2, 20.7, 14.0. MS (ESI)  $m/z$ : 451 [M+H]<sup>+</sup>.

**1-Phenethyl-*N*<sup>6</sup>-propyl-*N*<sup>4</sup>-(4-(trifluoromethoxy)phenyl)-1*H*-pyrazolo[3,4-*d*]pyrimidine-4,6-diamine (10d)**

Synthesized according to **GP6** starting from **9e**, using *n*-propylamine as nucleophile. Yield: 30%. White solid.  $^1\text{H}$  NMR (CDCl<sub>3</sub>): 7.61 (d,  $J$  = 8.8 Hz, 2H), 7.40 (s, 1H), 7.22 (m, 7H), 5.06 (t,  $J$  = 5.2 Hz, 1H), 4.44 (t,  $J$  = 8 Hz, 2H), 3.40 (q,  $J$  = 6.8 Hz, 2H), 3.17 (t,  $J$  = 7.6 Hz, 2H), 1.64 (q,  $J$  = 7.6 Hz, 2H), 0.99 (t,  $J$  = 7.4 Hz, 3H).  $^{13}\text{C}$  NMR (CDCl<sub>3</sub>): 161.0, 156.2, 155.0, 145.7, 138.5, 137.1, 130.7, 128.8, 128.4, 126.4, 123.6, 121.8, 119.3, 95.9, 47.8, 43.5, 35.6, 23.0, 11.6. MS (ESI)  $m/z$ : 457 [M+H]<sup>+</sup>, 479 [M+Na]<sup>+</sup>.

***N*<sup>4</sup>-(3-chlorophenyl)-*N*<sup>6</sup>-methyl-1-phenethyl-1*H*-pyrazolo[3,4-*d*]pyrimidine-4,6-diamine (10e)**

Synthesized according to **GP6** starting from **9a**, using methylamine 1M in THF (5.0 eq.) as nucleophile. Yield: 58%. Light brown solid.  $^1\text{H}$  NMR (CDCl<sub>3</sub>): 7.85 (s, 1H), 7.53 (s, 1H); 7.38 (d,  $J$  = 6.8 Hz, 1H); 7.22 (m, 6H); 7.09 (d,  $J$  = 8 Hz, 1H), 5.07 (d,  $J$  = 4.4 Hz, 1H), 4.44 (t,  $J$  = 7.6 Hz, 2H), 3.17 (t,  $J$  = 7.6 Hz, 2H), 3.02 (d,  $J$  = 4.4 Hz, 2H).  $^{13}\text{C}$  NMR (CDCl<sub>3</sub>): 161.8, 156.2, 154.8, 139.8, 138.4, 134.6, 130.7, 129.9, 128.8, 128.5, 126.5, 124.2, 122.0, 119.7, 96.3, 47.8, 35.7, 28.6. MS (ESI)  $m/z$ : 379 [M+H]<sup>+</sup>, 401 [M+Na]<sup>+</sup>.

***N*<sup>4</sup>,*N*<sup>6</sup>-dimethyl-1-phenethyl-3-phenyl-1*H*-pyrazolo[3,4-*d*]pyrimidine-4,6-diamine (10f)**

Synthesized according to **GP6** starting from **9n** using methylamine sol 40 % in H<sub>2</sub>O (15.00 eq.) as nucleophile. The crude was purified by flash chromatography using DCM:MeOH = 99:1 as eluent. Yield: 49%. White solid.  $^1\text{H}$  NMR (CDCl<sub>3</sub>): 7.63 (d,  $J$  = 7.6 Hz, 2H); 7.50 (t,  $J$  = 8 Hz, 2H); 7.44 (m, 1H); 7.28 (m, 4H); 7.22 (m, 1H); 5.10 (bs, 1H); 5.00 (bs, 1H); 4.50 (t,  $J$  = 8 Hz, 2H); 3.24 (t,  $J$

= 8 Hz, 2H); 3.04 (d,  $J$  = 4.8 Hz, 3H); 2.99 (d,  $J$  = 4.8 Hz, 3H).  $^{13}\text{C}$  NMR ( $\text{CDCl}_3$ ): 162.1, 157.9, 156.6, 144.0, 138.8, 134.4, 129.2, 128.9, 128.9, 128.6, 128.3, 126.4, 94.0, 47.8, 35.8, 28.5, 27.5. **MS (ES)**  $m/z$ : 359  $[\text{M}+\text{H}]^+$ .

**1-(2-Methoxy-2-phenylethyl)- $N^4,N^6$ -dimethyl-3-phenyl-1*H*-pyrazolo[3,4-*d*]pyrimidine-4,6-diamine (10g)**

Synthesized according to **GP6** starting from **9o** using methylamine sol 40 % in  $\text{H}_2\text{O}$  (15.00 eq.) as nucleophile. The crude was purified by flash chromatography using  $\text{DCM}:\text{MeOH} = 99:1$  as eluent. Yield: 40%. White solid.  $^1\text{H}$  NMR ( $\text{CDCl}_3$ ): 7.61 (d,  $J$  = 7.6 Hz, 2H); 7.49 (t,  $J$  = 7.2 Hz, 2H); 7.42 (m, 3H); 7.32 (m, 3H); 5.10 (bs, 2H); 4.92 (dd,  $J$  = 8.4, 4.8 Hz, 1H); 4.63 (dd,  $J$  = 8.4, 5.2 Hz, 1H); 4.32 (dd,  $J$  = 4.8, 14 Hz, 1H); 3.22 (s, 3H); 3.02 (d,  $J$  = 5.2 Hz, 3H); 2.99 (d,  $J$  = 4.8 Hz, 3H).  $^{13}\text{C}$  NMR ( $\text{CDCl}_3$ ): 161.7, 157.7, 156.9, 144.1, 139.4, 134.3, 129.2, 128.6, 128.4, 128.0, 127.1, 93.9, 81.7, 57.1, 52.5, 28.5, 27.6. **MS (ES)**  $m/z$ : 389  $[\text{M}+\text{H}]^+$ .

***N*-(3-chlorophenyl)-1-phenethyl-1*H*-pyrazolo[3,4-*d*]pyrimidin-4-amine (11a)**

Synthesized starting from **9a**, according to **GP8**. Yield: 67%. White solid.  $^1\text{H}$  NMR ( $(\text{CD}_3)_2\text{S}=\text{O}$ ): 8.27 (s, 1H), 7.97 (s, 1H), 7.20 (m, 9H), 4.23 (t,  $J$  = 7.6 Hz, 2H), 3.20 (t,  $J$  = 7.6 Hz, 2H).  $^{13}\text{C}$  NMR ( $\text{CDCl}_3$ ): 158.1, 154.8, 153.1, 152.8, 140.5, 131.9, 129.7, 128.5, 125.9, 122.2, 121.7, 112.6, 111.1, 108.9, 100.1, 48.6, 35.8. **MS (ESI)**  $m/z$ : 350  $[\text{M}+\text{H}]^+$ .

**1-Phenethyl-*N*-(4-(trifluoromethoxy)phenyl)-1*H*-pyrazolo[3,4-*d*]pyrimidin-4-amine (11b)**

Synthesized starting from **9e**, according to **GP8**. Yield: 67%. Light brown solid.  $^1\text{H}$  NMR ( $\text{CDCl}_3$ ): 8.37 (s, 1H), 7.56 (d,  $J$  = 8.8 Hz, 2H), 7.23 (m, 8H), 4.62 (t,  $J$  = 7.6 Hz, 2H), 3.20 (t,  $J$  = 7.6 Hz, 2H).  $^{13}\text{C}$  NMR ( $\text{CDCl}_3$ ): 154.8, 153.1, 152.8, 147.5, 135.7, 131.9, 128.7, 128.5, 126.7, 125.9, 122.2, 121.7, 119.1, 100.1, 48.6, 35.8. **MS (ESI)**  $m/z$ : 400  $[\text{M}+\text{H}]^+$ , 422  $[\text{M}+\text{Na}]^+$ .

**1-(2-Methoxy-2-phenylethyl)-3-phenyl-1*H*-pyrazolo[3,4-*d*]pyrimidin-4-amine (11c)**

Synthesized starting from **9p**, according to **GP8**. Yield: 87% White solid. <sup>1</sup>H NMR (CDCl<sub>3</sub>): 8.30 (s, 1H), 7.65 (m, 2H), 7.57 (m, 3H), 7.34 (m, 5H), 4.81 (m, 2H); 4.44 (m, 1H); 3.16 (s, 3H). <sup>13</sup>C NMR (CDCl<sub>3</sub>): 157.4, 155.6, 153.8, 141.6, 138.6, 133.0, 129.2, 128.7, 128.6, 127.6, 127.5, 127.4, 98.6, 84.6, 67.9, 56.4. **MS (ES)** *m/z*: 346 [M+H]<sup>+</sup>.

**1-((1-Benzyl-1*H*-1,2,3-triazol-4-yl)methyl)-4-chloro-6-(methylthio)-1*H*-pyrazolo[3,4-*d*]pyrimidine (12)**

Synthesized according to **GP7**, starting from **8d**. Yield: 40%. White solid. <sup>1</sup>H NMR ((CD<sub>3</sub>)<sub>2</sub>CO): 8.05 (s, 1H), 7.89 (s, 1H), 7.25 (m, 5H), 5.62 (s, 2H), 5.49 (s, 2H), 2.51 (s, 3H). <sup>13</sup>C NMR ((CD<sub>3</sub>)<sub>2</sub>CO): 170.8, 154.8, 154.2, 143.4, 136.7, 133.2, 129.6, 129.0, 128.8, 124.3, 111.2, 54.3, 43.5, 14.4. **MS (ESI)** *m/z*: 372 [M+H]<sup>+</sup>, 394 [M+Na]<sup>+</sup>.

**3-(1-((1-Benzyl-1*H*-1,2,3-triazol-4-yl)methyl)-6-(methylthio)-1*H*-pyrazolo[3,4-*d*]pyrimidin-4-ylamino)phenol (13a)**

Synthesized according to **GP3**, starting from **12** (Yield: quant.) or alternatively, according **GP7** starting from **9k** (Yield: 45%). Light brown solid. <sup>1</sup>H NMR ((CD<sub>3</sub>)<sub>2</sub>CO): 7.49 (s, 1H), 7.30 (s, 1H), 7.10 (m, 5H), 6.20 (m, 4H), 5.00 (s, 2H), 4.76 (s, 2H), 2.49 (s, 3H). <sup>13</sup>C NMR ((CD<sub>3</sub>)<sub>2</sub>CO): 171.0, 159.0, 154.2, 152.0, 144.5, 143.2, 136.3, 134.4, 131.0, 129.1, 128.7, 125.8, 123.2, 108.9, 105.9, 103.2, 99.8, 57.1, 53.4, 14.3. **MS (ESI)** *m/z*: 445 [M+H]<sup>+</sup>.

**1-((1-benzyl-1*H*-1,2,3-triazol-4-yl)methyl)-*N*-methyl-6-(methylthio)-*N*-(pyridin-3-yl)-1*H*-pyrazolo[3,4-*d*]pyrimidin-4-amine (13b)**



Synthesized according to **GP3**, starting from **12** (Yield: 85%) or alternatively, according **GP7** starting from **9l** (Yield: 45%). Light brown solid. <sup>1</sup>H NMR (CDCl<sub>3</sub>): 8.56 (d, *J* = 3.6 Hz, 1H), 7.89 (s, 1H), 7.69 (t, *J* = 7.4 Hz, 1H), 7.24 (m, 2H), 5.40 (s, 2H); 5.09 (s, 2H), 4.86 (d, *J* = 4.4 Hz, 3H), 2.57 (s, 3H). <sup>13</sup>C NMR (CDCl<sub>3</sub>): 170.8, 156.3, 155.7, 154.0, 148.7, 143.4, 137.5, 124.3, 122.7, 111.3, 54.3, 43.7, 36.5, 14.1. MS (ESI) *m/z*: 444 [M+H]<sup>+</sup>.

**1-((1-benzyl-1*H*-1,2,3-triazol-4-yl)methyl)-6-(methylthio)-*N*-(4-(trifluoromethoxy)phenyl)-1*H*-pyrazolo[3,4-*d*]pyrimidin-4-amine (13c)**

Synthesized according to **GP3**, starting from **12** (Yield: quant.) or alternatively, according **GP7** starting from **9m** (Yield: 42%). Light brown solid. <sup>1</sup>H NMR (CDCl<sub>3</sub>): 8.35 (bs, 1H); 7.69 (d, *J* = 8.8, 2H); 7.49 (s, 1H), 7.35 (m, 1H), 7.21 (m, 5H), 5.53 (s, 2H), 5.47 (s, 2H), 2.41 (s, 3H). <sup>13</sup>C NMR (CDCl<sub>3</sub>): 169.8, 154.3, 153.7, 146.0, 143.6, 137.0, 134.1, 132.2, 129.2, 128.9, 128.2, 123.9, 123.0, 121.8, 121.6, 98.3, 54.4, 41.6, 14.1. MS (ESI) *m/z*: 514 [M+H]<sup>+</sup>, 536 [M+Na]<sup>+</sup>.

## 2. Enzymatic Assays

Active recombinant kinases were purchased from ProQuinase (Germany). Specific peptide substrates (Abltide, cat. 12-493; Src Substrate Peptide, cat 12-140) were purchased from Merk-Millipore. Kinase assays were performed as follow: active Src and Abl *wt* reactions were performed in presence of 100  $\mu$ M ATP and 50  $\mu$ M peptide substrate. All inhibition assays were conducted with 0.01  $\mu$ g active kinase, 0.33 pmol [ $^{32}$ P]ATP, 60 mM HEPES-NaOH pH 7.5, 3  $\mu$ M Na-orthovanadate, 1.2 mM DTT, 50  $\mu$ g/ml PEG<sub>20.000</sub>, 10 mM magnesium acetate, 0,004%NP40 and 10 % DMSO in a final volume of 10  $\mu$ L. Enzymes and inhibitors were preincubated in ice for 5 min; after addition of the substrates the reaction was conducted at 30 °C for 10 min. The reaction was stopped by adding 5  $\mu$ L of 0,8 % phosphoric acid. Aliquots (10  $\mu$ L) were then transferred into a P30 Filtermat (PerkinElmer), washed five times with 75 mM phosphoric acid and once with acetone for 5 mins. The filter was dried and transferred to a sealable plastic bag, and scintillation cocktail (4 mL) was added. Spotted reactions were read in a scintillation counter. The ID<sub>50</sub> values were obtained according to Equation (1), where  $v$  is the measured reaction velocity,  $V$  is the apparent maximal velocity in the absence of inhibitor,  $I$  is the inhibitor concentration, and the ID<sub>50</sub> is the 50% inhibitory dose.

$$(1) \quad v = V / (1 + (I / ID_{50}))$$

$K_i$  values, expressed as a concentration ( $\mu$ M), toward recombinant enzymes were calculated according to Equation (2) for competitive inhibition toward ATP and peptide substrates, where  $[S_{ATP}]$  and  $[S_{pep}]$  are the concentration of competing substrate (ATP and peptide, respectively). Curve fitting was performed with the program GraphPad Prism version 5.00.

$$(2) \quad K_i = (ID_{50} / (1 + K_{mATP} / [S_{ATP}])) / (1 + K_{mpep} / [S_{pep}])$$
